# Supplementary material for: Homoepitaxial growth on semiconductor nanocrystals for efficient and stable visible-light photocatalytic hydrogen evolution
Source: Royal Society of Chemistry journal article supplement (doi:10.1039/c7nr05206e), 2017-01-01
Supplement: c7nr05206e1.pdf [file c7nr05206e1.pdf]

**Homoepitaxial growth on semiconductor nanocrystals for efficient and stable  
visible-light photocatalytic hydrogen evolution**

*Zheng Fang,<sup>a,b</sup> Jiajing Zhou,<sup>b</sup> Yimin Sun,<sup>c</sup> Jinhua Hu,<sup>a</sup> Li Liang,<sup>a</sup> Rong Xu,<sup>b\*</sup>*

*Hongwei Duan<sup>b\*</sup>*

<sup>a</sup> *State Key Laboratory of Food Science and Technology, School of Food Science and Technology,  
Jiangnan University, Wuxi, Jiangsu, 214122, People's Republic of China*

<sup>b</sup> *School of Chemical and Biomedical Engineering, Nanyang Technological University, 70 Nanyang  
Drive, Singapore 637457*

<sup>c</sup> *School of Materials Science and Engineering, Wuhan Institute of Technology, Wuhan, Hubei  
430073, People's Republic of China.*

*Email: [hduan@ntu.edu.sg](mailto:hduan@ntu.edu.sg); [rxu@ntu.edu.sg](mailto:rxu@ntu.edu.sg)*

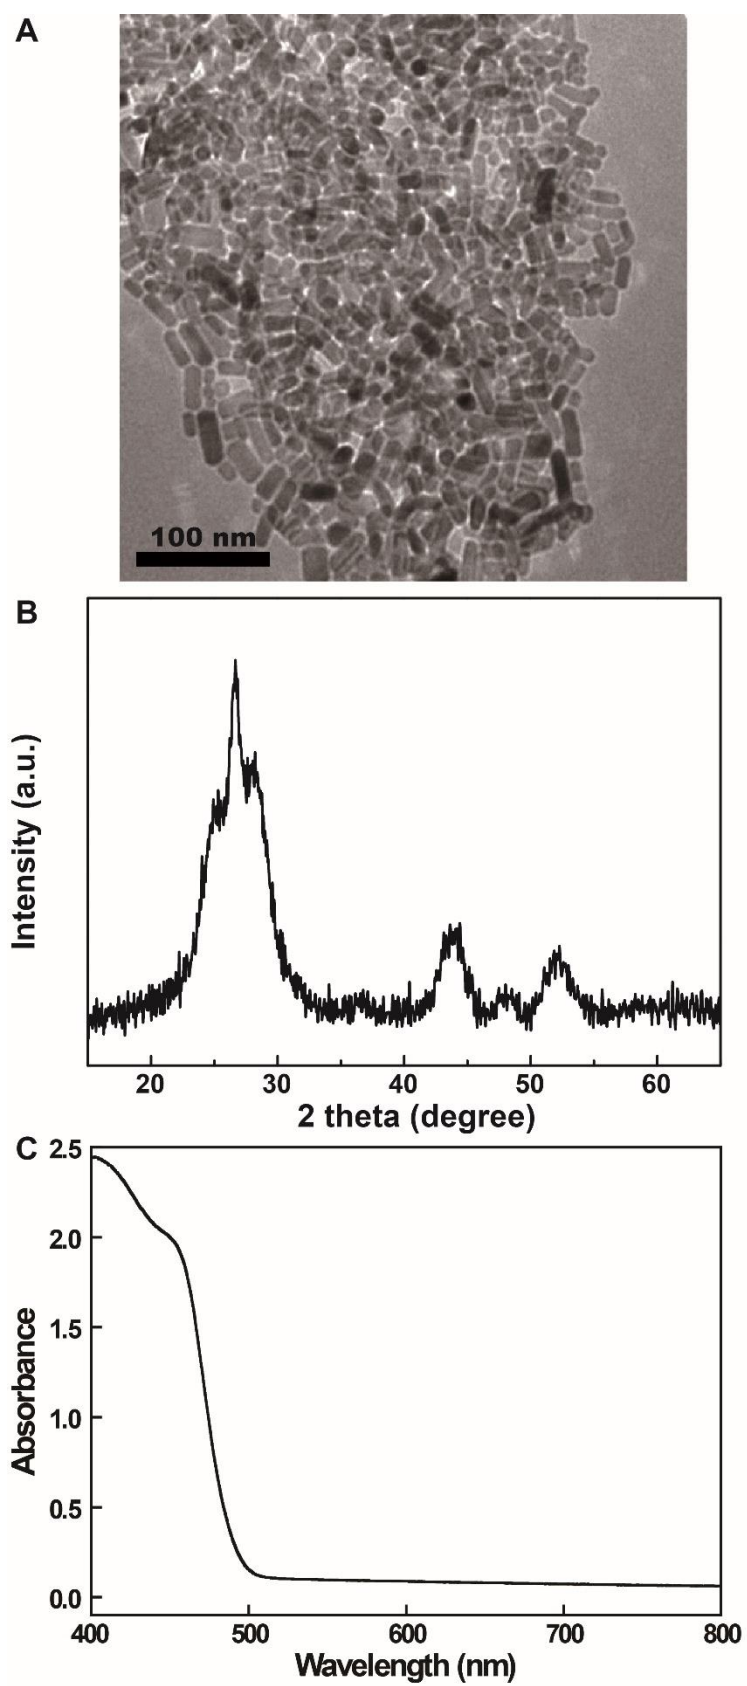

**Figure S1.** TEM (A), XRD pattern (B) and UV-vis spectra (C) of CdS NCs by decomposition of  $\text{Cd}(\text{DDTC})_2$  at 140 °C for 30 minutes in the presence of OAm and

ODE.

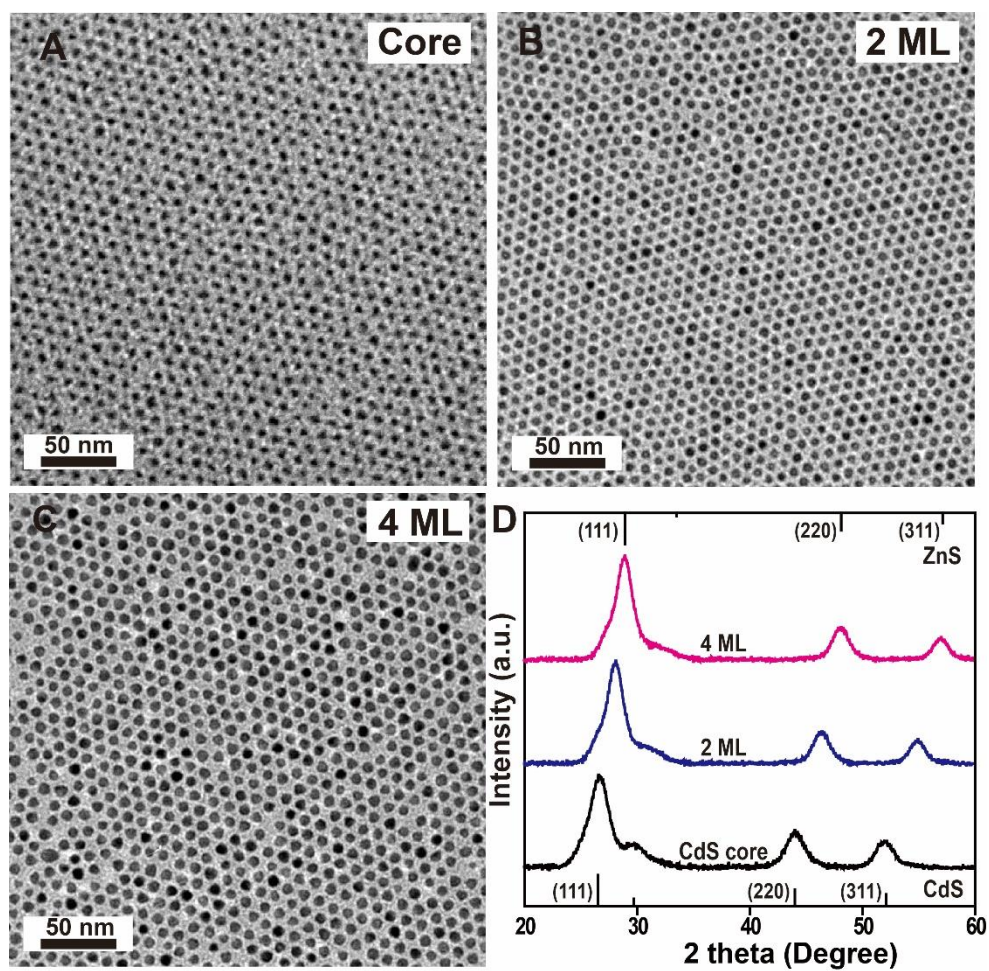

**Fig. S2.** TEM images of CdS<sub>3.6 nm</sub> core (A) and CdS/ZnS<sub>2ML</sub>(B), CdS/ZnS<sub>4ML</sub>(C), and XRD pattern for CdS/ZnS core/shell NCs by varying the shell thickness from 2 ML to 4 ML (D).

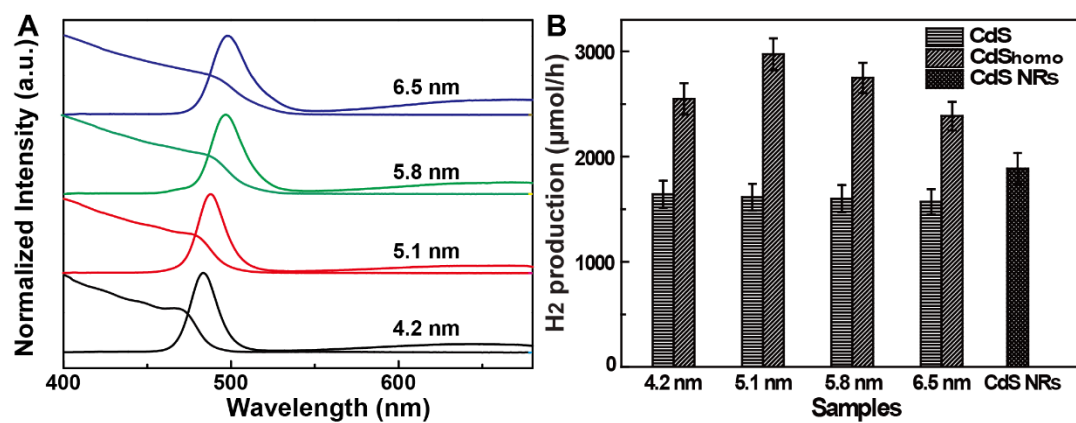

**Fig. S3.** (A) The UV-vis and fluorescence spectra of CdS nanocrystals with different particle size. (B) The H<sub>2</sub> production rate of same size CdS, CdS<sub>homo</sub> NCs and CdS NRs directly decomposed from Cd(DDTC)<sub>2</sub>.

**Table S1** Visible-Light-Driven CdS based photocatalysts for hydrogen evolution

| photocatalyst     | mass (g) | light source  | incident light | aqueous reaction solution                                               | activity ( $\mu\text{mol}\cdot\text{h}^{-1}\cdot\text{g}^{-1}$ ) | QE (%<br>420 nm) | Ref.            |
|-------------------|----------|---------------|----------------|-------------------------------------------------------------------------|------------------------------------------------------------------|------------------|-----------------|
| <b>Pt/CdS</b>     | 0.3      | 300 W Xe lamp | > 420 nm       | 0.5 M Na <sub>2</sub> S +<br>0.5 M Na <sub>2</sub> SO <sub>3</sub>      | 16                                                               | <b>51</b>        | <b>1</b>        |
| <b>Pd/CdS</b>     |          |               |                |                                                                         | 12.73                                                            | <b>40</b>        |                 |
| <b>Pt–Pd/CdS</b>  |          |               |                |                                                                         | 16.5                                                             | <b>53</b>        |                 |
| <b>PdS/CdS</b>    |          |               |                |                                                                         | 19.96                                                            | <b>64</b>        |                 |
| <b>Pt–PdS/CdS</b> |          |               |                |                                                                         | 29.23                                                            | <b>93</b>        |                 |
| <b>Pt/CdS</b>     | 0.15     | 300 W Xe lamp | $\geq 420$ nm  | 0.35 M<br>Na <sub>2</sub> SO <sub>3</sub> + 0.25<br>M Na <sub>2</sub> S | 27.33                                                            | <b>60.34</b>     | <b>2</b>        |
| <b>NiS/CdS</b>    | 0.3      | 300 W Xe lamp | $\geq 420$ nm  | 0.25 M<br>Na <sub>2</sub> S+0.35 M<br>Na <sub>2</sub> SO <sub>3</sub>   | 7.26                                                             | <b>51.3</b>      | <b>3</b>        |
| <b>Pt-CdS</b>     | 0.1      | 300 W Xe lamp | $\geq 420$ nm  | 20 vol% of L-<br>(+)-lactic acid                                        | 29.63                                                            | <b>70.0</b>      | <b>our work</b> |

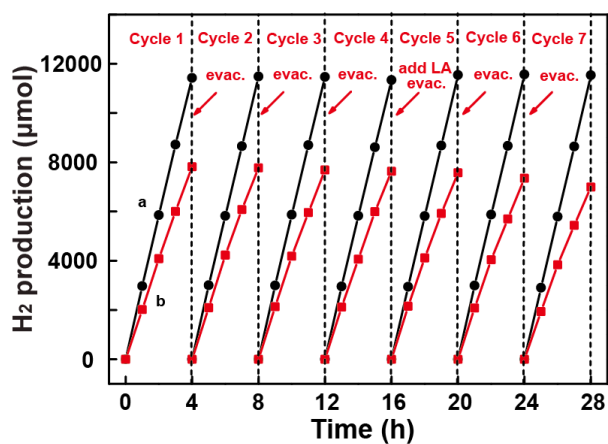

**Fig. S4.** The stability of H<sub>2</sub> evolution under 7 cycles of irradiation, the system was evacuated after each cycle of irradiation, and L-(+)-lactic acid was supplemented after 4 cycles of irradiation.

## References

- 1 H. Yan, J. Yang, G. Ma, G. Wu, X. Zong, Z. Lei, J. Shi, C. Li, J. Catal., 2009, **266**, 165-168.
- 2 N. Bao, L. Shen, T. Takata, K. Domen, Chem. Mater., 2007, **20**, 110-117.
- 3 W. Zhang, Y. Wang, Z. Wang, Z. Zhongb, R. Xu. Chem. Commun., 2010, **46**, 7631-7633
